1 **Microbial dormancy improves predictability of soil respiration at the seasonal time**  
2 **scale**

3

4 Salazar A.<sup>1,2</sup>, Lennon J.T.<sup>3</sup>, and Dukes J.S.<sup>1,2,4</sup>.

5

6 <sup>1</sup> Department of Biological Sciences, Purdue University, IN, USA.

7 <sup>2</sup> Purdue Climate Change Research Center, Purdue University, West Lafayette, IN, USA.

8 <sup>3</sup> Department of Biology, Indiana University, Bloomington, IN, USA.

9 <sup>4</sup> Department of Forestry and Natural Resources, Purdue University, IN, USA.

10

11 Corresponding author: Alejandro Salazar. Email: [alejandro.salazar-](mailto:alejandro.salazar-)

12 [villegas@fulbrightmail.org](mailto:villegas@fulbrightmail.org). Phone number: +3547862781.

13

14 **Acknowledgments**

15

16 We gratefully acknowledge the help of Clara Vasquez and Risa McNellis with the  
17 fieldwork at BACE, the help of Elizabeth Morgan Davis and Nishit Banka with the PLFA  
18 analyses, and the help of Christiane Hassel with the flow cytometry analyses. We further  
19 acknowledge the many technicians and assistants who constructed and maintained the  
20 BACE. AS acknowledges COLCIENCIAS (Departamento Administrativo de Ciencia  
21 Tecnología e Innovación en Colombia) and the Fulbright-Colombia program. In addition,  
22 this work was supported in part by National Science Foundation Dimensions of  
23 Biodiversity Grant 1442246 (JTL) and US Army Research Office Grant W911NF-14-1-

24 0411 (JTL). Work at the BACE was made possible by funding from the United States  
25 Department of Agriculture (USDA; 2015-67003-23485; JSD). The BACE was built and  
26 maintained with funding from the National Science Foundation (DEB-0546670 and  
27 DEB-1146279) and the US Department of Energy's Office of Science (BER), through the  
28 Northeastern Regional Center of the National Institute for Climatic Change Research, and  
29 the Terrestrial Ecosystem Science program. We thank the University of Massachusetts  
30 and UMass Extension for leasing land to the BACE. Partial support for JSD's  
31 participation in this project was provided by Hatch project 1000026 of the USDA's  
32 National Institute of Food and Agriculture. This is paper no. 1801 of the Purdue Climate  
33 Change Research Center (PCCRC). We declare no conflict of interest.

34

35

### 36 **Abstract**

37

38 Climate change is accelerating global soil respiration, which could in turn  
39 accelerate climate change. The biological mechanisms through which soil carbon (C)  
40 responds to climate are not well understood, limiting our ability to predict future global  
41 soil respiration rates. As part of a climate manipulation experiment, we tested whether  
42 differences in soil heterotrophic respiration driven by season or climate treatment ( $R_H$ )  
43 are linked to 1) relative abundances of microbes in active and dormant metabolic states,  
44 2) net changes in microbial biomass and/or 3) changes in the relative abundances of  
45 microbial groups with different C-use strategies. We used a flow-cytometric single-cell  
46 metabolic assay to quantify the abundance of active and dormant microbes, and the

47 phospholipid fatty acid (PLFA) method to determine microbial biomass and ratios of  
48 fungi:bacteria and Gram-positive:Gram-negative bacteria.  $R_H$  did not respond to climate  
49 treatments but was greater in the warm and dry summer than in the cool and less-dry fall.  
50 These dynamics were better explained when microbial data were taken into account  
51 compared to when only physical data (temperature and moisture) were used. Overall, our  
52 results suggest that  $R_H$  responses to temperature are stronger when soil contains more  
53 active microbes, and that seasonal patterns of  $R_H$  can be better explained by shifts in  
54 microbial activity than by shifts in the relative abundances of fungi and Gram-positive  
55 and Gram-negative bacteria. These findings contribute to our understanding of how and  
56 under which conditions microbes influence soil C responses to climate.

57

58 Key words: Boston-Area Climate Experiment, carbon-climate feedback, microbial  
59 biomass, precipitation change, warming.

60

61

## 62 **Introduction**

63

64 Every year, microbes from terrestrial ecosystems emit approximately 54 Pg C into  
65 the atmosphere via soil heterotrophic respiration (Hashimoto et al., 2015). This is more  
66 than five times the amount of C released by fossil fuel emissions in 2016 (ca. 10 Pg C; Le  
67 Quéré et al., 2016). Even small increases in this soil C flux, if sustained, could contribute  
68 to accelerated global warming. Unless suppressed by dry conditions (Allison and  
69 Treseder, 2008; Schindlbacher et al., 2012, Suseela et al. 2012), warming generally

70 increases soil respiration (Carey et al., 2016). Evidence from the last 50 years (i.e., since  
71 the first soil respiration records) suggests that soil respiration, both total (i.e., plant roots  
72 and soil microbes,  $R_S$ ; Bond-Lamberty and Thomson, 2010; Zhao et al., 2017; Bond-  
73 Lamberty et al., 2018) and heterotrophic (i.e., microbes in root-free soil,  $R_H$ ; Hashimoto  
74 et al., 2015; Bond-Lamberty et al., 2018) have been increasing with temperature at a rate  
75 of approximately  $0.04 \text{ Pg C y}^{-1}$  (Zhao et al., 2017);  $0.1 \text{ Pg C y}^{-1}$  in the last 3 decades  
76 (Bond-Lamberty and Thomson, 2010). If changes in global temperature and precipitation  
77 regimes accelerate turnover of soil C without proportionally increasing C inputs from  
78 plant growth, this would generate a positive soil C-climate feedback.

79

80         The mechanisms through which global soil respiration is increasing are not clear,  
81 limiting our ability to predict whether this trend is going to accelerate, stabilize, or  
82 decrease. Current projections of feedbacks between terrestrial C and climate remain  
83 highly uncertain (Friedlingstein et al., 2014), which limits their usefulness to inform  
84 climate policy. Recent studies have raised the question of whether or not these  
85 uncertainties could be reduced by a better understanding of how microorganisms respond  
86 to climatic changes (Bardgett et al., 2008; Wieder et al., 2015).

87

88         Two of the best-studied microbial parameters that can be linked to  $R_H$  are  
89 microbial biomass (Ileris et al., 2003; Wang et al., 2003; Lee and Jose, 2003; Liu et al.,  
90 2009; Zhou et al., 2011) and community composition (Zogg et al., 1997; Monson et al.,  
91 2006; Waldrop and Firestone, 2006; Cleveland et al., 2007; Zhou et al., 2011; Don et al.,  
92 2017). Assuming that all microbes are active and respiring, one would expect soil  $R_H$  to

93 increase with the abundance of soil microorganisms. This idea is supported by  
94 observations of simultaneous increases or decreases of microbial biomass and  $R_H$  in  
95 response to warming (Zhou et al., 2011), moisture (Illeris et al., 2003; Liu et al., 2009),  
96 substrate availability (Wang et al., 2003) and plant biomass removal (Zhang et al., 2005).  
97 However, other studies have failed to find a consistent relationship between microbial  
98 biomass and  $R_H$  (Waldrop and Firestone, 2006; Waring and Hawkes, 2015; Birge et al.,  
99 2015; Buchkowski et al., 2015), suggesting that microbial parameters besides biomass  
100 may contribute to changes in  $R_H$ . Hypotheses linking  $R_H$  and community composition  
101 postulate that a given set of external factors will distinctly favor the growth of particular  
102 microbial groups, based on their C needs and C use efficiencies. This idea is supported by  
103 observations of, for example, warming increasing the abundance of microbial functional  
104 populations specialized in the degradation of labile C, but not recalcitrant C (Zhou et al.,  
105 2011).

106

107       After microbial biomass and community composition, a third microbial parameter  
108 that has been increasingly proposed as an explanatory factor of  $R_H$  is microbial dormancy  
109 (Placella et al., 2012; Manzoni et al., 2014; Wang et al., 2014; Wang et al., 2015; Barnard  
110 et al., 2015; He et al., 2015; Salazar et al., 2018). In addition to growing, dying, and  
111 changing composition, microbial communities in soil can switch between active and  
112 dormant metabolic states (Stenström et al., 2001; Schimel et al., 2007; Lennon and Jones,  
113 2011), for example, in response to warming and drying/wetting cycles (Barnard et al.,  
114 2015; Salazar et al., 2018). Changes of metabolic state are generally faster than growth,  
115 death, and changes in composition (Blagodatskaya and Kuzyakov, 2013). In part because

116 of this, most experiments exploring the relationship between microbial dormancy and  $R_H$   
117 have examined short temporal scales (Placella et al., 2012; Aanderud et al., 2015;  
118 Barnard et al., 2015; Salazar et al., 2016). Much less is known about the importance of  
119 microbial dormancy for  $R_H$  at longer (e.g., seasonal) temporal scales, which are more  
120 relevant for modeling purposes and society-level decision making.

121

122 In this study, we investigated whether seasonal  $R_H$  in a temperate old-field  
123 ecosystem is linked to changes in the metabolic state of microbial communities in soil; to  
124 net changes in microbial biomass; and/or to changes in the relative abundances of  
125 microbial groups that consume and emit soil C at different rates, namely, fungi and  
126 bacteria (Six et al., 2006; Sinsabaugh et al., 2016), and Gram-positive and Gram-negative  
127 bacteria (Lennon et al., 2012). In addition to the potential changes in total microbial  
128 biomass (Devi and Yadava, 2006) and community composition (Waldrop and Firestone,  
129 2006) that can occur on a seasonal time scale, we expected seasonal changes in  
130 temperature and moisture to affect the metabolic state of microbial communities in soil.  
131 Specifically, we expected the abundance of active microbial biomass to be highest when  
132 environmental conditions are optimum for microbial processes, and for this to help  
133 explain seasonal changes in soil respiration rates.

134

135 **Methods**

136

137 **Study site**

138

139           The study was conducted at the Boston-Area Climate Experiment (BACE),  
140   located at the University of Massachusetts' former Suburban Experiment Station in  
141   Waltham, Massachusetts (42°23.1'N, 71°12.9'W). The mean annual temperature and  
142   precipitation at the site are 10.3 °C and 1063 mm, respectively. The soil at BACE is  
143   classified as Mesic Typic Dystrudept (Haven series), with loamy topsoil (45% sand, 46%  
144   silt, 9% clay; gravel content: 7%) and a gravelly sandy loam subsoil. The plant  
145   community is dominated by non-native grasses and forbs (Hoeppner and Dukes, 2012).

146

147           To guarantee that the measured  $R_H$  was caused by microbial activity and not by  
148   plant roots, we collected all of our samples from patches of soil that were isolated from  
149   roots and plant carbon inputs by “root-exclusion collars.” These collars were made of 30-  
150   cm diameter plastic pipe that had been driven 30 cm into the soil in November 2007  
151   (Suseela et al., 2012). The collars extended ~4 cm above the soil surface. To prevent  
152   plant growth within these root-exclusion collars, we covered the soil surface within each  
153   collar with a circle of weed-blocking nylon mesh. This mesh was removed only during  
154    $R_H$  measurements and soil sampling. Carbon inputs had been limited in this manner for  
155   the previous nine years; by the fourth year of plant exclusion (2011), labile organic  
156   matter remaining in the soils was already substantially depleted in comparison to the  
157   surrounding soils in which plants grew, as shown by lower rates of substrate-induced  
158   respiration (Koyama et al. 2018). Thus, our use of these root-free soils with similar past C  
159   inputs enabled a controlled examination of microbial responses, but the sustained lack of  
160   plant inputs and the consequently depleted labile organic matter need to be kept in mind  
161   when interpreting our results.

162

163 **Experimental design**

164

165           The BACE manipulated climatic conditions in 36 square experimental plots, each  
166 2 m x 2 m. A factorial combination of four levels of warming and three levels of  
167 precipitation created a total of 12 climate treatments. The experiment consisted of three  
168 replicate blocks. Within each block, plots were arranged linearly in three groups of four,  
169 with each group receiving one of the three precipitation treatments. The four plots within  
170 each group were spaced 1 m apart, with one plot receiving each of the four levels of  
171 warming. Each block was located under a single greenhouse frame that served as a mount  
172 for infrastructure related to the precipitation treatments.

173

174           Warming was applied with ceramic infrared heaters mounted 1 m above each  
175 corner of each plot, and facing towards the center of the plot and down at a 45° angle.  
176 The treatments corresponded to the wattage of the heaters surrounding each plot:  
177 unheated (0 W), low (200 W), medium (600 W), and high (1000 W) heat. The three  
178 heated plots within each group were wired to a single circuit, and the warming system  
179 was programmed to attempt to maintain a 4 °C difference between the canopy  
180 temperatures of the unheated and high heat plots within each group. The power supplied  
181 to the heaters in each group was adjusted every 10 s based on the measured temperature  
182 difference between the unheated and high heat plots in that group. Canopy temperatures  
183 were measured with infrared radiometers (IRR-PN; Apogee Instruments, Logan, UT,  
184 USA) placed at a 45° downward angle, 1 m above the northern edges of the plots. The



185 four warming levels approximately simulated the different warming scenarios projected  
186 by the Intergovernmental Panel on Climate Change (IPCC) for the end of this century  
187 (Stocker, 2014).

188

189 The precipitation manipulation included ambient, dry (-50% of all precipitation  
190 year-round), and wet (+50% growing season rainfall) treatments. Above the dry  
191 treatment, rainfall was captured by 15 cm-wide clear polycarbonate slats spaced 15 cm  
192 apart that were mounted on the greenhouse frames, >2 m off the ground. From early May  
193 to mid-November, the removed rainfall was collected in tanks and immediately applied to  
194 the wet treatments with a sprinkler system. Further details of the experiment can be found  
195 in Hoepfner and Dukes (2012), Suseela et al., (2012), and Auyeung et al., (2013).

196

### 197 ***In situ* soil measurements and sampling**

198

199 We made *in situ* soil measurements ( $R_H$ , and microbial activity/dormancy) and  
200 collected samples for analysis in the laboratory in the summer (June) and fall (October)  
201 of 2016. For simplicity, we refer to these measurements by the season in which they were  
202 made, but it is important to recognize that they represent snapshots of the conditions at  
203 the moment of sampling and not an average of the respective months or seasons.

204

205 We measured  $R_H$  with a LICOR 6400 soil CO<sub>2</sub> flux chamber (LI-COR  
206 Biosciences, Inc. Lincoln, NE, USA), in small PVC collars (10 cm in diameter and 5 cm  
207 in height, 2 cm into the soil) that we had installed within the root-exclusion collars in

208 April 2016. During the  $R_H$  measurements we also measured soil temperature (10 cm)  
209 using a thermocouple probe. We measured volumetric soil moisture on the same day  
210 using time-domain reflectometry waveguides installed vertically (0-10 cm depth) in the  
211 root-exclusion collars.

212

213 We used a soil sampler (2 cm diameter) to collect soil from the top 10 cm  
214 immediately after measuring  $R_H$ . We used 1 g of the soil for measuring *in situ* active and  
215 dormant microbial biomass (see below). We stored the rest of the soil in coolers with ice  
216 packs and transported them to Purdue University where we measured microbial biomass  
217 and fungi:bacteria and Gram-positive-Gram-negative ratios (see below). At Purdue,  
218 samples were stored at 4 °C until all samples were processed.

219

## 220 **Abundance of active and dormant microbes in soil**

221

222 We used a flow-cytometric single-cell metabolic assay to quantify active and  
223 dormant microbial abundance (del Giorgio and Gasol, 2008). Immediately after  
224 measuring  $R_H$  and collecting soil samples in each plot, we mixed 1 g of soil with 9 mL of  
225 distilled, sterile water and vortexed this solution for 1 min. We filtered the solution  
226 (particle retention > 11  $\mu\text{m}$ ) to remove large debris. We sampled 0.8 mL of the filtered  
227 solution and added 0.1 mL of 4',6-diamidino-2-phenylindole (DAPI; 5  $\mu\text{g}$  DAPI  $\text{mL}^{-1}$   
228 final concentration) and 0.1 mL of 5-cyano-2,3-ditolyl tetrazolium chloride (CTC; 5 mM  
229 final concentration) to stain all and respiring-only cells, respectively. DAPI stains the  
230 DNA of all viable cells while only metabolically active cells can transform the electron

231 acceptor CTC to the fluorophore CTC-formazan (Kaprelyants and Kell, 1993). We mixed  
232 this solution in a shaker for 30 min and then stopped the reaction by storing the samples  
233 in coolers with ice packs. Immediately after processing all samples, we shipped them to  
234 the flow cytometry facility at Indiana University, USA. To check for potential auto-  
235 fluorescence in soil, we also analyzed negative-control unstained samples for each plot.  
236

237 To estimate the abundance of active (i.e., DAPI and CTC co-labeled) and dormant  
238 (i.e., DAPI-only labeled) cells, we used an LSRII flow cytometer (Becton-Dickinson, San  
239 Jose, CA) equipped with Forward Scatter PMT (FSC-PMT) for improved resolution of  
240 small particles. We used the FACSDiva v.6.1.3 software for data analysis. DAPI was  
241 excited with a 20mW 405nm laser, and detected using a 450/50 filter, while CTC was  
242 excited with a 30mW 488nm laser, and detected using a 695/40 filter. To further resolve  
243 small particles, we set the LSRII window extension at 2.00 (rather than the default of  
244 10.00). To minimize the amount of debris and background included in the sample  
245 analysis, we set thresholds at 1000 and 750 for FSC-PMT and SSC parameters,  
246 respectively. We ran controls (unlabeled, DAPI, and CTC) for each sample, and saved  
247 10,000 events per sample. The sample injection was rinsed after each sample in order to  
248 minimize any cross contamination between samples. An example of the analysis output  
249 (Figure S1) is shown in the supplementary material.

250

251 We acknowledge three caveats with our approach for measuring abundance of  
252 active and dormant cells: 1) we did not measure dead cells, so our estimate of dormant  
253 cells could be overestimated by non-CTC stained cells that were not viable, 2) a fraction

254 of the dormant cells in soil could have been activated when suspending samples in water  
255 for dye application, which would underestimate the proportion of inactive cells, and 3)  
256 Because CTC stains bacteria but not fungi and because we measured abundance of  
257 CTC/DAPI labeled cells based on light scattering characteristics of *Escherichia coli* (see  
258 supplementary material), our measurements of microbial activity reflect bacteria but not  
259 fungi. Based on these caveats, we made the following assumptions: We assumed that the  
260 cell structure of most dead cells was compromised, preventing the cells from retaining  
261 DAPI-labeled DNA and/or affecting its light scattering characteristics, and we therefore  
262 assumed that most dead cells were not counted as dormant. We also assumed that any  
263 activation of dormant cells during the exposure to the dyes was minimal (which seems  
264 reasonable considering the low fractions of active bacteria – see Results) and similar for  
265 all samples (i.e., allowing comparisons among treatments). Because bacteria dominated  
266 the root-free soils considered in this study (see Results), we suspect that measurements of  
267 bacterial activity are a reasonable indicator of overall soil microbial activity.

268

### 269 **Microbial biomass and relative abundances of microbial groups**

270

271 We measured microbial biomass, fungi:bacteria ratios, and Gram-positive:Gram-  
272 negative ratios with the phospholipid fatty acid (PLFA) method (Hurst et al., 1997). We  
273 estimated microbial biomass based on analysis of phospholipid phosphates (PLPO<sub>4</sub>) and  
274 fungi:bacteria and Gram-positive:Gram-negative ratios based on analysis of  
275 phospholipids fatty acids (as in Acosta-Martinez et al., 1999). We extracted lipids from 5  
276 g of soil (bags stored at 4 °C) using a chloroform/methanol/phosphate buffer and

277 fractionated phospholipids using column chromatography. We measured PLPO<sub>4</sub>  
278 colorimetrically at 610 nm (DU<sup>®</sup>730 UV/VIS spectrophotometer, Beckman Coulter, Inc.,  
279 Fullerton, CA) and fatty acids via Gas Chromatography-Mass Spectrometric Detection  
280 (Agilent 7890, Agilent 5975 MSD, Agilent Technologies Inc., Santa Clara, CA).

281

282 We calculated fungi:bacteria ratio as the predominant fungal PLFAs 18:2w6,  
283 divided by the sum of the predominant bacteria PLFAs 14:0, i15:0, a15:0, 15:0, 16:0,  
284 10Me16:0, i17:0, a17:0, cy17:0, Me18:0, and cy19:0 (Bååth and Anderson, 2003).  
285 Similarly, we calculated Gram-positive:Gram-negative ratios as the sum of Gram-  
286 positive PLFAs i15:0, a15:0, i17:0, and a17:0, divided by the sum of Gram-negative  
287 PLFAs cy19:0 and cy17:0 (Joynt et al, 2006).

288

289 The PLFA method does not allow a highly resolved analysis of the composition  
290 and structure of microbial communities in soil. However, previous studies have shown  
291 that respiration responses to the environments are conserved at fairly coarse phylogenetic  
292 scales (Lennon et al., 2012).

293

## 294 **Statistical analysis**

295

296 We first analyzed the effects of the warming and precipitation treatments (fixed  
297 effects) on R<sub>H</sub>, using a mixed-effects model that included time as a fixed effect and block  
298 as a random effect. For this we used the *lmer* function from the *lme4* package (Bates et  
299 al., 2014) in R, version 3.3.1. We then used a multiple correlation analysis (*lm* function)

300 to estimate how much of the seasonal (fixed effect) differences in  $R_H$  were explained by  
301 soil temperature, moisture, Total Microbial Biomass (TMB), Active Microbial Biomass  
302 (AMB), and the relative abundance of microbial groups (i.e., fungi:bacteria and Gram-  
303 positive:Gram-negative ratios). We used the *glmulti* function, from the *glmulti* package  
304 (Calcagno and de Mazancourt, 2010), to select the best statistical model. We compared  
305 models based on the Bayesian Information Criterion (BIC), which accounts for  
306 differences in the number of explanatory variables among models.

307

## 308 **Results**

309

310 The warming and precipitation treatments affected environmental conditions, but  
311 had little effect on  $R_H$  in these relatively dry soils. Instead,  $R_H$  differed across seasons.  
312 These seasonal differences in  $R_H$  were explained better by temperature and the abundance  
313 of actively respiring cells than by environmental or microbial variables alone.

314

### 315 **Effect of experimental warming on soil temperature**

316

317 The warming treatments increased ( $P < 0.05$ ; Table S1) soil temperature in both  
318 seasons (Figure 1 a and b). Soil temperature was affected by the precipitation treatments  
319 as well. Soil temperature was higher ( $P < 0.05$ ) in the dry (and less plant-shaded) plots  
320 than in the ambient and wet plots, especially in the Fall ( $P = 0.06$ ). In the summer, soil  
321 temperature ranged from  $21.5 \pm 1.2$  °C in the unheated plots to  $23.9 \pm 2.0$  °C in the high  
322 heated plots. In the fall, soil temperature ranged from  $15.4 \pm 1.5$  °C in the unheated plots

323 to  $17.9 \pm 1.7$  °C in the high heated plots. Differences in soil temperature between  
324 unheated and high heated plots were ca. 2.5 °C in both seasons, while differences  
325 between seasons were in average ca. 6 °C. Overall, differences in soil temperature were  
326 larger between seasons than across warming treatments.

327

### 328 **Effect of precipitation manipulation on soil moisture**

329

330 Although there were differences ( $P < 0.05$ ) in soil moisture across seasons and  
331 precipitation treatments (Figure 1 c and d; Table S2), soils were fairly dry ( $<20\%$  v/v) in  
332 all cases. Differences in soil moisture across treatments were larger ( $P = 0.02$ ) in the fall  
333 than in the summer. In the fall, soils from the dry treatment (ca. 5% v/v) were drier than  
334 those from the ambient and wet plots (ca. 12% v/v in both precipitation treatments across  
335 all warming treatments). Averaged across treatments, soils were drier in the summer (6%  
336 v/v) than the fall (9% v/v;  $P < 0.01$ ) (see also Figure 2c).

337

### 338 **Effects of warming and precipitation treatments on $R_H$**

339

340  $R_H$  did not differ ( $P > 0.05$ ) across the warming and precipitation treatments but it  
341 differed ( $P < 0.05$ ) between seasons (Figure 1 e and f; Table S3). In the summer,  $R_H$   
342 averaged  $2.88 \pm 0.30$   $\mu\text{mol m}^{-2} \text{s}^{-1}$  across all the warming and precipitation treatments. By  
343 the fall, average  $R_H$  ( $1.16 \pm 0.05$   $\mu\text{mol m}^{-2} \text{s}^{-1}$ ) had decreased ( $P < 0.05$ ) by more than 50%.  
344 Although in the fall  $R_H$  tended to increase from dry to wet plots (Figure 1f), this trend  
345 (like all other differences across treatments) was not statistically significant (Table S3).

346

### 347 **Effects of warming and precipitation treatments on microbial parameters**

348

349       Microbial parameters differed between seasons but were unaffected or weakly  
350 affected by treatments (Figure 2 and Tables S4-7). Although microbial biomass  
351 responded to warming under some precipitation treatments (i.e., marginal interaction,  $P =$   
352  $0.07$ ; Figure 2 a and b; Table S4), and active microbial biomass and fungi:bacteria ratios  
353 marginally ( $P = 0.05$  and  $P = 0.06$ , respectively) increased with warming, differences in  
354 microbial parameters across treatments were small in comparison with the marked  
355 differences between seasons. From summer to fall, microbial biomass and Gram  
356 positive:Gram negative ratios increased ( $P < 0.05$ ) by 60% (Figures 2 a and b; Table S4)  
357 and 16% (Figures 2 g and h; Table S7), respectively; fungi:bacteria ratios did not change  
358 (Figure 2 e and f; Table S6); and active microbial biomass decreased ( $P < 0.05$ ) by 40%  
359 (Figure 2 c and d; Table S5).

360

### 361 **Predictors of seasonal $R_H$**

362

363       Seasonal differences in  $R_H$  were primarily explained by temperature and the  
364 abundance of metabolically active microbes in soil (Table 1). The statistical model that  
365 best fitted our data ( $P < 0.05$ , BIC = 69.7, Table S4) surprisingly suggests that decreases  
366 in  $R_H$  between the summer and fall were associated with increases ( $P < 0.05$ ) in TMB,  
367 TMB having a different influence on  $R_H$  in each season ( $P < 0.05$ ). For reasons that we  
368 discuss below, we also analyzed the second best statistical model ( $P < 0.05$ , BIC = 81.5),



369 which suggests that seasonal decreases in  $R_H$  from summer to fall were associated with  
370 decreases in temperature and in the abundance of actively respiring cells in soil (Table 1).

371

372 Overall, temperature and moisture explained seasonal soil respiration better than  
373 microbial processes alone, but incorporation of microbial data increased explanatory  
374 power (Figure 3). Our results suggest that, on average,  $\log(R_H)$  increased by  $0.11 \mu\text{mol}$   
375  $\text{m}^{-2} \text{s}^{-1}$  per  $1^\circ\text{C}$  increase in soil temperature (Table 1) and that the magnitude of this  
376 response increased with the abundance of active microbes in soil (Figure 4). This model  
377 explained 35% (adjusted  $R^2$ ) of the variation in  $R_H$ .

378

## 379 **Discussion**

380

381 Recently, the policy relevance of soil C-climate feedbacks has motivated a wide  
382 range of research on mechanisms that regulate soil C cycling, and their associated  
383 temporal scales. One of those mechanisms is the metabolic activation and deactivation of  
384 soil microbes in response to favorable and stressful environmental conditions. Previous  
385 studies have demonstrated that soil respiratory responses to temperature and moisture at a  
386 temporal scale of hours to days are associated with microbes switching between active  
387 and dormant metabolic states (Placella et al., 2012; Barnard et al., 2015; Salazar et al.,  
388 2016). However, less is known about the importance of these mechanisms over longer  
389 timescales. The results of this study suggest that the abundance of active microbes in soil  
390 changes at the seasonal scale too, and that these shifts affect soil respiration rates.

391

392           The abundances of total and active microbes in soil can change across seasons. In  
393 our study, AMB (and  $R_H$ ) was greater in the summer than in the fall. However, TMB was  
394 greater in the fall than in the summer. Increases in TMB between June and October could  
395 have been partially caused by increases in soil moisture, which likely facilitated access of  
396 microbes to nutrients. Increases in soil moisture during the still warm end of the summer  
397 could have stimulated microbial growth, but decreases in temperature in the fall likely  
398 induced a large proportion of microbes in the soil to enter dormancy. This could explain  
399 why AMB was higher in the summer than in the fall, even though TMB was lower. We  
400 know of only one other study that simultaneously monitored TMB and AMB at the  
401 seasonal scale. In it, Van de Werf and Verstraete (1987) found TMB to increase by 29%  
402 from June to August in a fallow topsoil, while AMB remained practically unchanged  
403 (Van de Werf and Verstraete, 1987). However, in winter-wheat soil both TMB and AMB  
404 increased from June to August (Van de Werf and Verstraete, 1987). This suggests that  
405 seasonal changes in TMB and AMB can also be affected by soil type and/or agricultural  
406 practices (see also Girvan et al., 2003). Similarly, in the first year of a two-year warming  
407 study in a temperate forest (Schindlbacher et al., 2011), microbial biomass increased  
408 (both in heated and unheated treatments) by 30% from July to September, while  
409 microbial metabolic activity (measured as soil respiration rates per concentration of  
410 microbial biomass) decreased by 50%. Interestingly, in the second year, these trends  
411 reversed (Schindlbacher et al., 2011). Together, our results and these observations show  
412 that the amount of total and active microbial biomass in soil do not necessarily change in  
413 the same direction and at the same time across seasons.  
414

415           Seasonal changes in microbial biomass can happen in parallel with changes in  
416 community composition. In our study, increases in TMB (and decreases in AMB)  
417 between summer and fall were accompanied, on average, by a decrease in fungi:bacteria  
418 ratios (Figure 2 e and f) and an increase in Gram positive:Gram negative ratios (Figure 2  
419 g and h). The change in fungi:bacteria ratio could have been caused by warmer summer  
420 temperatures favoring fungi over bacteria (Zhang et al., 2005, Castro et al., 2010) and/or  
421 by faster bacterial growth between the summer and the fall as soil moisture increased  
422 (Figure 1 c and d). Although fungi play a key role in soil C cycling in some systems such  
423 as nutrient-rich forest soil (Baldrian et al., 2012), the root-free soil from this experiment  
424 was dominated by bacteria (fungi:bacteria ratios were always  $< 0.1$ ). This suggests that  
425 changes within the bacterial community may have been more important for soil C cycling  
426 than relative changes in the abundance of fungi and bacteria.

427

428           Our multiple regression analysis suggests two alternative, and possibly  
429 complementary, explanations for why the microbial parameters discussed above  
430 contribute to seasonal  $R_H$ . The statistical model that best fitted our data suggests a  
431 relationship between seasonal decreases in  $R_H$  with increases in TMB. An inverse  
432 relationship between TMB and  $R_H$  could reflect pulses of  $R_H$  caused by active microbes  
433 recycling necromass C (Geyer et al., 2016). It is plausible that the more severe dryness in  
434 the summer than in the fall in our study, led to elevated microbial mortality and therefore  
435 to a larger abundance of necromass C accessible to active microbes. However, given the  
436 capacity of microbes to adjust their metabolism and remain viable under stressful  
437 conditions, the contributions of cell lysis to soil C fluxes is probably insignificant

438 (Halverson et al., 2000). We do not know of any other biological process that could  
439 explain this result and therefore recommend caution when interpreting its causality. On  
440 the other hand, the statistical model that provided the second-best fit to our data suggests  
441 that seasonal decreases in  $R_H$  from summer to fall were driven by decreases in soil  
442 temperature and in the abundance of metabolically active microbes in soil. This is  
443 consistent with theory of microbial physiology (Stenström et al., 2001; Schimel et al.,  
444 2007; Lennon and Jones, 2011) and with experiments conducted at short temporal scales  
445 (Placella et al., 2012; Aanderud et al., 2015; Barnard et al., 2015; Salazar et al., 2016). If  
446 our one-time measurements of active/dormant biomass from summer and fall are close to  
447 the respective seasonal averages, our results would indicate that temperature and  
448 microbial metabolism data alone are powerful in predicting seasonal  $R_H$ .

449

450         Although Gram-positive:Gram-negative ratios did not contribute to the best-  
451 fitting models of  $R_H$  (Tables 1 and S8), changes within the bacterial community could  
452 help to explain the relationship between AMB and  $R_H$ . Increases in Gram-positive:Gram-  
453 negative ratio from summer to fall could have been associated with different capabilities  
454 of the bacterial groups to cope with moisture stress. Gram-positive bacteria have a  
455 peptidoglycan-rich cell wall that makes them more resistant to dry conditions than Gram-  
456 negative bacteria (Halverson et al., 2000; Fuchslueger et al., 2014). Considering that soils  
457 in our experiment were relatively dry (< 20% v/v) in both seasons, it is likely that Gram-  
458 negative bacteria were more severely affected by moisture stress than their thick-cell-wall  
459 counterparts. Some Gram-negative bacteria have higher maximum respiration rates than  
460 Gram-positive bacteria (e.g. Acidobacteria vs. Actinobacteria, respectively; Lennon et al.,

461 2012). It is possible that from summer to fall there were larger decreases in the  
462 abundance of metabolically active microbes with high maximum respiration rates but low  
463 resistance to dryness (e.g. Acidobacteria), relative to bacterial groups with low maximum  
464 respiration rates but high resistance to dryness (e.g. Actinobacteria). However, not all  
465 Gram-negative bacteria have higher maximum respiration rates than Gram-positive  
466 bacteria. Gram-positive Firmicutes have higher maximum respiration rates than Gram-  
467 negative Acidobacteria, Bacteroidetes and Proteobacteria (Lennon et al., 2012).  
468 Therefore, decreases in  $R_H$  between summer and fall could also have been associated  
469 with metabolic deactivation of microbes with high maximum respiration rates and high  
470 resistance to dryness. We would need a more resolved composition analysis to know  
471 which (if any) of these alternative explanations was the case in our study. Nonetheless,  
472 our results suggest that, as soil moisture levels change, the abundance of microbial  
473 groups with different levels of resistance to dryness could influence the size of the  
474 microbial pool that remains metabolically active.

475

476 Finally, our findings suggest that the effect of temperature on  $R_H$  gets stronger  
477 with the abundance of metabolically active microbes in soil. Microbes that are pushed to  
478 enter dormancy by moisture stress are practically unaffected by changes in temperature.  
479 However, the metabolic rates (e.g. respiration) of active microbes are sensitive to  
480 temperature (Anderson and Domsch, 1985) and therefore it is reasonable to expect that a  
481 greater abundance of active microbes in soil makes  $R_H$  more sensitive to temperature.  
482 This builds on previous observations of  $R_H$  being less sensitive to warming (and

483 precipitation) under dry, presumably water-stressed conditions (Schindlbacher et al.,  
484 2012, Suseela et al., 2012; Koyama et al. 2018).

485

486 In summary, we found that 1) seasonal changes in total microbial biomass in soil  
487 do not necessarily reflect changes in the amount of microbial biomass that is  
488 metabolically active and capable of driving soil C processes, 2) the metabolic state of soil  
489 microbial communities can be more important for seasonal  $R_H$  than the relative  
490 abundances of microbial groups such as fungi and bacteria (Gram-positive and Gram-  
491 negative), and 3) the magnitude of the temperature effect on  $R_H$  increases with the  
492 abundance of metabolically active microbes in soil. This work builds on recent research  
493 distinguishing active from dormant microbes and highlighting the importance of the  
494 metabolically active community for microbe-driven processes. Although few studies to  
495 date have linked microbial metabolic state patterns with rates of soil  $CO_2$  efflux, our  
496 findings suggest the possibility that recent increases in global soil respiration rates could  
497 be linked to climate-driven increases in the abundance of metabolically active microbes  
498 in soil.

499

## 500 **References**

501

502 Aanderud Z, Jones S, Fierer N, Lennon JT (2015) Resuscitation of the rare biosphere  
503 contributes to pulses of ecosystem activity. *Front Microbiol* 6: 24.

504 <https://doi.org/10.3389/fmicb.2015.00024>

505

506 Acosta-Martinez V, Reicher Z, Bischoff M, Turco RF (1999) The role of tree leaf mulch  
507 and nitrogen fertilizer on turfgrass soil quality. *Biol Fertil Soils* 29: 55-61.

508 <https://doi.org/10.1007/s003740050>

509

510 Allison SD, Treseder KK (2008) Warming and drying suppress microbial activity and  
511 carbon cycling in boreal forest soils. *Global Change Biol* 14:2898-2909.

512 <https://doi.org/10.1111/j.1365-2486.2008.01716.x>

513

514 Anderson TH, Domsch KH (1985) Determination of ecophysiological maintenance  
515 carbon requirements of soil microorganisms in a dormant state. *Biol Fertil Soils* 1:81-89.

516

517 Auyeung DS, Suseela V, Dukes JS (2013) Warming and drought reduce temperature  
518 sensitivity of nitrogen transformations. *Global Change Biol* 19:662-676.

519 <https://doi.org/10.1111/gcb.12063>

520

521 Bååth E, Anderson T-H (2003) Comparison of soil fungal/bacterial ratios in a pH  
522 gradient using physiological and PLFA-based techniques. *Soil Biol Biochem* 35:955-963.

523 [https://doi.org/10.1016/S0038-0717\(03\)00154-8](https://doi.org/10.1016/S0038-0717(03)00154-8)

524

525 Baldrian P, Kolařík M, Štursová M, Kopecký J, Valášková V, Větrovský T, Žifčáková L,  
526 Šnajdr J, Rídl J, Vlček Č, Voříšková J (2012) Active and total microbial communities in

527 forest soil are largely different and highly stratified during decomposition. *ISME J* 6:248-

528 258. <http://doi.org/10.1038/ismej.2011.95>

529

530 Bardgett RD, Freeman C, Ostle NJ (2008) Microbial contributions to climate change  
531 through carbon cycle feedbacks. *ISME J* 2:805-814. <http://doi.org/10.1038/ismej.2008.58>

532

533 Barnard RL, Osborne CA, Firestone MK (2015) Changing precipitation pattern alters soil  
534 microbial community response to wet-up under a Mediterranean-type climate. *ISME J*  
535 9:946-957. <http://doi.org/10.1038/ismej.2014.192>

536

537 Bates D, Maechler M, Bolker B, Walker S, Christensen RHB, Singmann H, Dai B, and  
538 Grothendieck G (2014) Package ‘lme4’. R foundation for statistical computing, Vienna,  
539 12.

540

541 Birge HE, Conant RT, Follett RF, Haddix ML, Morris SJ, Snapp SS, Wallenstein MD,  
542 Paul EA (2015) Soil respiration is not limited by reductions in microbial biomass during  
543 long-term soil incubations. *Soil Biol Biochem* 81:304-310.

544 <https://doi.org/10.1016/j.soilbio.2014.11.028>

545

546 Blagodatskaya E, Kuzyakov Y (2013) Active microorganisms in soil: Critical review of  
547 estimation criteria and approaches. *Soil Biol Biochem* 67:192-211.

548 <https://doi.org/10.1016/j.soilbio.2013.08.024>

549

550 Bond-Lamberty B, Thomson A (2010) Temperature-associated increases in the global  
551 soil respiration record. *Nature* 464:579-582. <http://doi.org/10.1038/nature08930>



552

553 Bond-Lamberty B, Bailey VL, Chen M, Gough CM, Vargas R (2018). Globally rising

554 soil heterotrophic respiration over recent decades. *Nature* 560:80-83.

555 <https://doi.org/10.1038/s41586-018-0358-x>

556

557 Buchkowski RW, Schmitz OJ, Bradford MA (2015) Microbial stoichiometry overrides

558 biomass as a regulator of soil carbon and nitrogen cycling. *Ecology* 96:1139-1149.

559 <https://doi.org/10.1890/14-1327.1>

560

561 Calcagno V, de Mazancourt C (2010) glmulti: an R package for easy automated model

562 selection with (generalized) linear models. *J Stat Softw* 34:1-29.

563

564 Carey JC, Tang J, Templer PH, Kroeger KD, Crowther TW, Burton, AJ, Dukes JS,

565 Emmett B, Frey SD, Heskell MA, Jiang L (2016) Temperature response of soil respiration

566 largely unaltered with experimental warming. *Proc Natl Acad Sci USA* 113:13797-

567 13802. <https://doi.org/10.1073/pnas.1605365113>

568

569 Castro HF, Classen AT, Austin EE, Norby RJ, Schadt CW (2010) Soil microbial

570 community responses to multiple experimental climate change drivers. *Appl Environ*

571 *Microbiol* 76:999-1007. <http://doi.org/10.1128/AEM.02874-09>

572

573 Cleveland CC, Nemergut DR, Schmidt SK, Townsend AR (2007) Increases in soil

574 respiration following labile carbon additions linked to rapid shifts in soil microbial

575 community composition. *Biogeochemistry* 82:229-240. <http://doi.org/10.1007/s10533->  
576 006-9065-z  
577  
578 del Giorgio PA, Gasol JM (2008) Physiological Structure and Single-Cell Activity in  
579 Marine Bacterioplankton. In: Kirchman, DL (ed) *Microbial Ecology of the Oceans*, 2nd  
580 edn. Wiley, New Jersey, pp 243-298.  
581  
582 Devi NB, Yadava PS (2006) Seasonal dynamics in soil microbial biomass C, N and P in a  
583 mixed-oak forest ecosystem of Manipur, North-east India. *Appl Soil Ecol* 31:220-227.  
584 <https://doi.org/10.1016/j.apsoil.2005.05.005>  
585  
586 Don A, Böhme IH, Dohrmann AB, Poeplau C, Tebbe CC (2017) Microbial community  
587 composition affects soil organic carbon turnover in mineral soils. *Biol Fertil Soils*  
588 53:445-456. <http://doi.org/10.1007/s00374-017-1198-9>  
589  
590 Friedlingstein P, Meinshausen M, Arora VK, Jones CD, Anav A, Liddicoat SK, Knutti, R  
591 (2014) Uncertainties in CMIP5 climate projections due to carbon cycle feedbacks. *J Clim*  
592 27:511-526. <https://doi.org/10.1175/JCLI-D-12-00579.1>  
593  
594 Fuchslueger L, Bahn M, Fritz K, Hasibeder R, Richter A (2014) Experimental drought  
595 reduces the transfer of recently fixed plant carbon to soil microbes and alters the bacterial  
596 community composition in a mountain meadow. *New Phytol* 201:916-927.  
597 <https://doi.org/10.1111/nph.12569>

598

599 Geyer KM, Kyker-Snowman E, Grandy AS, Frey SD (2016) Microbial carbon use  
600 efficiency: accounting for population, community, and ecosystem-scale controls over the  
601 fate of metabolized organic matter. *Biogeochemistry* 127:173-188.

602 <https://dx.doi.org/10.1007/s10533-016-0191-y>

603

604 Girvan MS, Bullimore J, Pretty JN, Osborn AM, Ball AS (2003) Soil type is the primary  
605 determinant of the composition of the total and active bacterial communities in arable  
606 soils. *Appl Environ Microbiol* 69:1800-1809. [http://doi.org/10.1128/AEM.69.3.1800-](http://doi.org/10.1128/AEM.69.3.1800-1809.2003)  
607 [1809.2003](http://doi.org/10.1128/AEM.69.3.1800-1809.2003)

608

609 Hashimoto S, Carvalhais N, Ito A, Migliavacca M, Nishina K, Reichstein M (2015)  
610 Global spatiotemporal distribution of soil respiration modeled using a global database.  
611 *Biogeosciences* 12:4121-4132. <http://doi.org/10.5194/bgd-12-4331-2015>

612

613 Halverson LJ, Jones TM, Firestone MK (2000) Release of intracellular solutes by four  
614 soil bacteria exposed to dilution stress. *Soil Sci Soc Am J.* 64:1630-1637.

615

616 He Y, Yang J, Zhuang Q, Harden JW, McGuire AD, Liu Y, Wang G, Gu L (2015)  
617 Incorporating microbial dormancy dynamics into soil decomposition models to improve  
618 quantification of soil carbon dynamics of northern temperate forests. *J Geophys Res*

619 *Biogeosci* 120:2596-2611. <https://doi.org/10.1002/2015JG003130>

620

- 621 Hoepfner SS, Dukes JS (2012) Interactive responses of old-field plant growth and  
622 composition to warming and precipitation. *Global Change Biol* 18:1754-1768.  
623 <https://doi.org/10.1111/j.1365-2486.2011.02626.x>  
624
- 625 Hurst CJ, Knudson GR, McInerney MJ, Stetzenbach LD, Walt MV (1997) *Manual of*  
626 *Environmental Microbiology* ASM Press. Washington, DC.  
627
- 628 Illeris L, Michelsen A, Jonasson S (2003) Soil plus root respiration and microbial  
629 biomass following water, nitrogen, and phosphorus application at a high arctic semi  
630 desert. *Biogeochemistry* 65:15-29.  
631
- 632 Joynt J, Bischoff M, Turco R, Konopka A, Nakatsu CH (2006) Microbial community  
633 analysis of soils contaminated with lead, chromium and petroleum hydrocarbons.  
634 *Microbial Ecol* 51:209-219. <http://doi.org/10.1007/s00248-005-0205-0>  
635
- 636 Kaprelyants AS, Kell DB (1993) The use of 5-cyano-2, 3-ditolylyl tetrazolium chloride and  
637 flow cytometry for the visualisation of respiratory activity in individual cells of  
638 *Micrococcus luteus*. *J Microbiol Methods* 17:115-122. [https://doi.org/10.1016/0167-](https://doi.org/10.1016/0167-7012(93)90004-2)  
639 [7012\(93\)90004-2](https://doi.org/10.1016/0167-7012(93)90004-2)  
640
- 641 Koyama A, Steinweg JM, Haddix ML, Dukes JS, Wallenstein MD (2018) Soil bacterial  
642 community responses to altered precipitation and temperature regimes in an old field

643 grassland are mediated by plants. *FEMS Microbiol Ecol* 94:fix156.

644 <https://doi.org/10.1093/femsec/fix156>

645

646 Le Quéré C, Andrew RM, Canadell JG, Sitch S, Korsbakken JI, Peters GP,... and Keeling

647 RF (2016) Global carbon budget 2016. *Earth Syst Sci Data* 8:605.

648 <http://doi.org/10.5194/essd-8-605-2016>

649

650 Lee KH, Jose S (2003) Soil respiration and microbial biomass in a pecan—cotton alley

651 cropping system in Southern USA. *Agrofor Syst* 58:45-54.

652

653 Lennon JT, Jones SE (2011) Microbial seed banks: the ecological and evolutionary

654 implications of dormancy. *Nat Rev Microbiol* 9:119-130.

655

656 Lennon JT, Aanderud ZT, Lehmkuhl BK, Schoolmaster DR (2012) Mapping the niche

657 space of soil microorganisms using taxonomy and traits. *Ecology* 93:1867-1879.

658 <https://doi.org/10.1890/11-1745.1>

659

660 Liu W, Zhang Z, Wan S (2009) Predominant role of water in regulating soil and

661 microbial respiration and their responses to climate change in a semiarid grassland.

662 *Global Change Biol* 15:184-195. <https://doi.org/10.1111/j.1365-2486.2008.01728.x>

663

- 664 Manzoni S, Schaeffer S, Katul G, Porporato A, Schimel J (2014) A theoretical analysis of  
665 microbial eco-physiological and diffusion limitations to carbon cycling in drying soils.  
666 *Soil Biol Biochem* 73:69-83. <https://doi.org/10.1016/j.soilbio.2014.02.008>  
667
- 668 Monson RK, Lipson DL, Burns SP, Turnipseed AA, Delany AC, Williams MW, Schmidt  
669 SK (2006) Winter forest soil respiration controlled by climate and microbial community  
670 composition. *Nature* 439:711-714. <http://doi.org/10.1038/nature04555>  
671
- 672 Placella SA, Brodie EL, Firestone MK (2012) Rainfall-induced carbon dioxide pulses  
673 result from sequential resuscitation of phylogenetically clustered microbial groups. *Proc*  
674 *Natl Acad Sci USA* 109:10931-10936. <https://doi.org/10.1073/pnas.1204306109>  
675
- 676 Salazar A, Sulman B, Dukes JS (2018) Microbial dormancy promotes microbial biomass  
677 and respiration across pulses of drying-wetting stress. *Soil Biol Biochem* 116:237-244.  
678 <https://doi.org/10.1016/j.soilbio.2017.10.017>  
679
- 680 Salazar-Villegas A, Blagodatskaya E, Dukes JS (2016) Changes in the size of the active  
681 microbial pool explain short-term soil respiratory responses to temperature and moisture.  
682 *Front Microbiol* 7. <http://doi.org/10.3389/fmicb.2016.00524>  
683
- 684 Schimel J, Balser TC, Wallenstein M (2007) Microbial stress-response physiology and its  
685 implications for ecosystem function. *Ecology* 88:1386-1394. [https://doi.org/10.1890/06-](https://doi.org/10.1890/06-0219)  
686 0219

687

688 Schindlbacher A, Rodler A, Kuffner M, Kitzler B, Sessitsch A, Zechmeister-Boltenstern

689 S (2011) Experimental warming effects on the microbial community of a temperate

690 mountain forest soil. *Soil Biol Biochem* 43:1417-1425.

691 <https://doi.org/10.1016/j.soilbio.2011.03.005>

692

693 Schindlbacher A, Wunderlich S, Borken W, Kitzler B, Zechmeister-Boltenstern S, Jandl

694 R (2012) Soil respiration under climate change: prolonged summer drought offsets soil

695 warming effects. *Global Change Biol* 18:2270-2279. <https://doi.org/10.1111/j.1365->

696 2486.2012.02696.x

697

698 Sinsabaugh RL, Turner BL, Talbot JM, Waring BG, Powers JS, Kuske CR, Moorhead

699 DL, Follstad Shah JJ (2016) Stoichiometry of microbial carbon use efficiency in soils.

700 *Ecol Monograph* 86:172-189. <https://doi.org/10.1890/15-2110.1>

701

702 Six J, Frey SD, Thiet RK, Batten KM (2006) Bacterial and fungal contributions to carbon

703 sequestration in agroecosystems. *Soil Sci Soc Am J* 70:555-569.

704 <http://doi.org/10.2136/sssaj2004.0347>

705

706 Stenström J, Svensson K, Johansson M (2001) Reversible transition between active and

707 dormant microbial states in soil. *FEMS Microbiol Ecol* 36:93-104.

708

709 Stocker T (2014) Climate change 2013: the physical science basis: Working Group I  
710 contribution to the Fifth assessment report of the Intergovernmental Panel on Climate  
711 Change. Cambridge University Press, United Kingdom and New York, USA.  
712

713 Suseela V, Conant RT, Wallenstein MD, Dukes JS (2012) Effects of soil moisture on the  
714 temperature sensitivity of heterotrophic respiration vary seasonally in an old-field climate  
715 change experiment. *Global Change Biol* 18:336-348. [https://doi.org/10.1111/j.1365-](https://doi.org/10.1111/j.1365-2486.2011.02516.x)  
716 [2486.2011.02516.x](https://doi.org/10.1111/j.1365-2486.2011.02516.x)  
717

718 Waldrop MP, Firestone MK (2006) Seasonal dynamics of microbial community  
719 composition and function in oak canopy and open grassland soils. *Microbial Ecol* 52:470-  
720 479. <http://doi.org/10.1007/s00248-006-9100-6>  
721

722 Wang WJ, Dalal RC, Moody PW, Smith CJ (2003) Relationships of soil respiration to  
723 microbial biomass, substrate availability and clay content. *Soil Biol Biochem* 35:273-  
724 284. [https://doi.org/10.1016/S0038-0717\(02\)00274-2](https://doi.org/10.1016/S0038-0717(02)00274-2)  
725

726 Wang G, Mayes MA, Gu L, Schadt CW (2014) Representation of Dormant and Active  
727 Microbial Dynamics for Ecosystem Modeling. *PloS one* 9:e89252.  
728 <https://doi.org/10.1371/journal.pone.0089252>  
729



- 730 Wang G, Jagadamma S, Mayes MA, Schadt CW, Steinweg JM, Gu L, Post WM (2015)  
731 Microbial dormancy improves development and experimental validation of ecosystem  
732 model. ISME J 9:1-12. <http://doi.org/10.1038/ismej.2014.120>  
733
- 734 Waring BG, Hawkes CV (2015) Short-term precipitation exclusion alters microbial  
735 responses to soil moisture in a wet tropical forest. Microbial Ecol 69:843-854.  
736 <http://doi.org/10.1007/s00248-014-0436-z>  
737
- 738 Wieder WR, Allison SD, Davidson EA, Georgiou K, Hararuk O, He Y, Hopkins F, Luo  
739 Y, Smith MJ, Sulman B, Todd-Brown K (2015) Explicitly representing soil microbial  
740 processes in Earth system models. Global Biogeochem Cy 29:1782-1800.  
741 <https://doi.org/10.1002/2015GB005188>  
742
- 743 Zhang W, Parker KM, Luo Y, Wan S, Wallace LL, Hu S (2005) Soil microbial responses  
744 to experimental warming and clipping in a tallgrass prairie. Global Change Biol 11:266-  
745 277. <https://doi.org/10.1111/j.1365-2486.2005.00902.x>  
746
- 747 Zhao Z, Peng C, Yang Q, Meng FR, Song X, Chen S, Epule TE, Li P, Zhu Q (2017)  
748 Model prediction of biome-specific global soil respiration from 1960 to 2012. Earth's  
749 Future 5:715-729. <https://doi.org/10.1002/2016EF000480>  
750

751 Zhou J, Xue K, Xie J, Deng Y, Wu L, Cheng X, Fei S, Deng S, He Z, Van Nostrand JD,

752 Luo Y (2011) Microbial mediation of carbon-cycle feedbacks to climate warming. Nat

753 Clim Change 2:106-110. <http://doi.org/10.1038/nclimate1331>

754

755 Zogg GP, Zak DR, Ringelberg DB, White DC, MacDonald NW, Pregitzer KS (1997)

756 Compositional and functional shifts in microbial communities due to soil warming. Soil

757 Sci Soc Am J 61:475-481.

758

759

760

761

762

763

764

765

766

767

768

769

770

771

772

773

774 **Tables**

775

776 **Table 1.** Statistics of the best explanatory model for seasonal  $R_H$ . Significance codes: P <

777 0.001 '\*\*\*', 0.001 < P < 0.01 '\*\*'.

|               | <b>Estimate</b> | <b>Std. Error</b> | <b>t-value</b> | <b>P</b>   |
|---------------|-----------------|-------------------|----------------|------------|
| Intercept     | -0.894          | 0.614             | -1.455         | 0.152      |
| Temp          | 0.107           | 0.025             | 4.254          | < 0.001*** |
| Temp:Moisture | -7.429          | 6.058             | -1.226         | 0.226      |
| Temp:log(AMB) | 0.008           | 0.003             | 2.730          | 0.009**    |

778

779

780

781

782

783

784

785

786

787

788

789

790

791

792

793

794

795 **Figures**

796

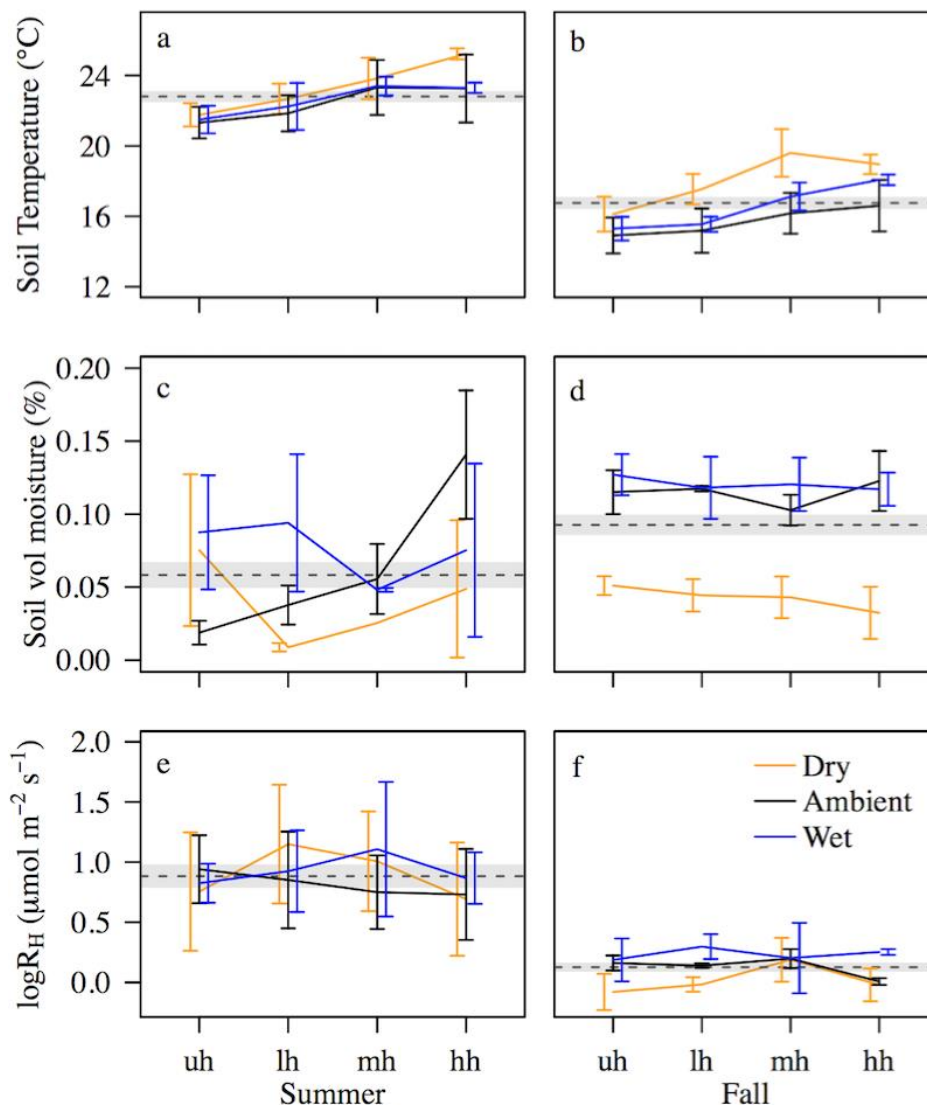

797

798

799 **Figure 1.** Soil temperature (a,b), moisture (c,d), and RH (e,f) in summer (a,c,e) and fall

800 (b,d,f) across warming and precipitation treatments. uh: unheated, lh: low heat, mh:

801 medium heat, and hh: high heat. Statistics in Tables S1-3. Values are means  $\pm$  SE.

802 Dashed lines and shaded areas indicate averaged  $\pm$  SE values in each season. No error bar

803 is shown in the mh-dry treatment in panel c because of missing data.

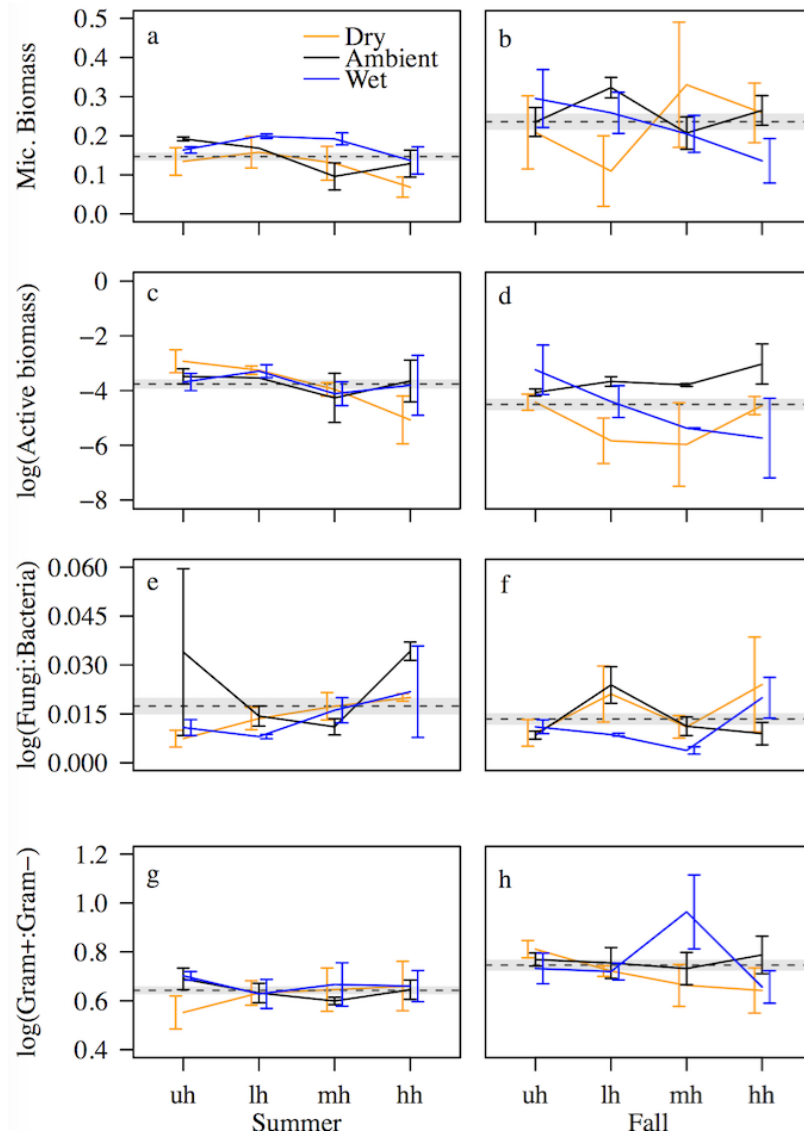

804

805 **Figure 2.** Microbial biomass (a,b; in phospholipid phosphate  $g^{-1}$  soil), Active biomass

806 (c,d; in phospholipid phosphate  $g^{-1}$  soil), Fungi:Bacteria ratios (e,f), and Gram

807 positive:Gram negative ratios (g,h), in summer (a,c,e,g) and fall (b,d,f,h) across warming

808 and precipitation treatments. uh: unheated, lh: low heat, mh: medium heat, and hh: high

809 heat. Statistics in Tables S4-7. AMB, and Fungi:Bacteria and Gram positive:Gram

810 negative ratios in statistical models were log transformed to meet assumptions. Values

811 are means  $\pm$  SE. Dashed lines and shaded areas indicate averaged  $\pm$  SE values in each

812 season. No error bars in lh-ambient treatment in panels a and c because of missing data.

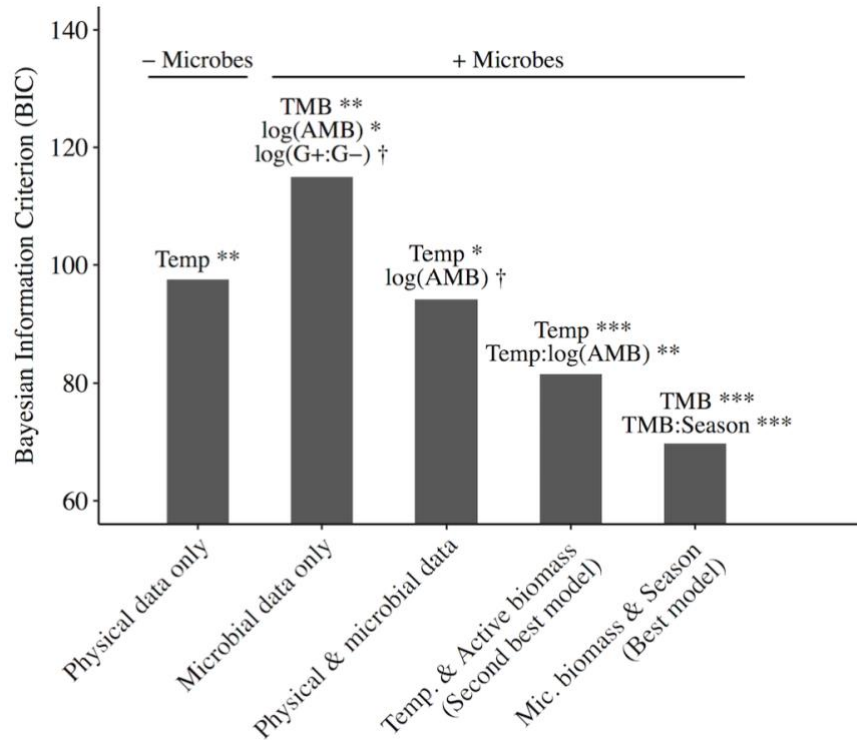

813

814 **Figure 3.** Goodness of fit, as measured by the Bayesian Information Criterion (BIC), of  
815 models of  $\log(R_H)$  that include different categories of explanatory variables. Lower  
816 scores indicate better model fits. Categories include models fitting  $\log(R_H)$  as a function  
817 of only physical conditions (as a function of temperature and moisture; statistics in Table  
818 S10); only values related to microbes: TMB,  $\log(\text{AMB})$ ,  $\log(\text{Fungi:Bacteria})$ , and  
819  $\log(\text{Gram-positive:Gram-negative})$ ; statistics in Table S9); with microbes and physical  
820 conditions (as a function of temperature, moisture, TMB,  $\log(\text{AMB})$ ,  $\log(\text{Fungi:Bacteria})$ ,  
821 and  $\log(\text{Gram-positive:Gram-negative})$ ; statistics in Table S11); the second best model  
822 (as a function of temperature and the interaction between temperature and  $\log(\text{AMB})$ ;  
823 statistics in Table 1); and the best (but see discussion) model (as a function of TMB, and  
824 the interactions between  $\log(\text{AMB})$  and moisture, and TMB and season; statistics in  
825 Table S8). Significance codes:  $P < 0.001$  '\*\*\*',  $0.001 < P < 0.01$  '\*\*',  $0.01 < P < 0.05$  '\*',  
826  $0.5 < P < 0.1$  '†'.

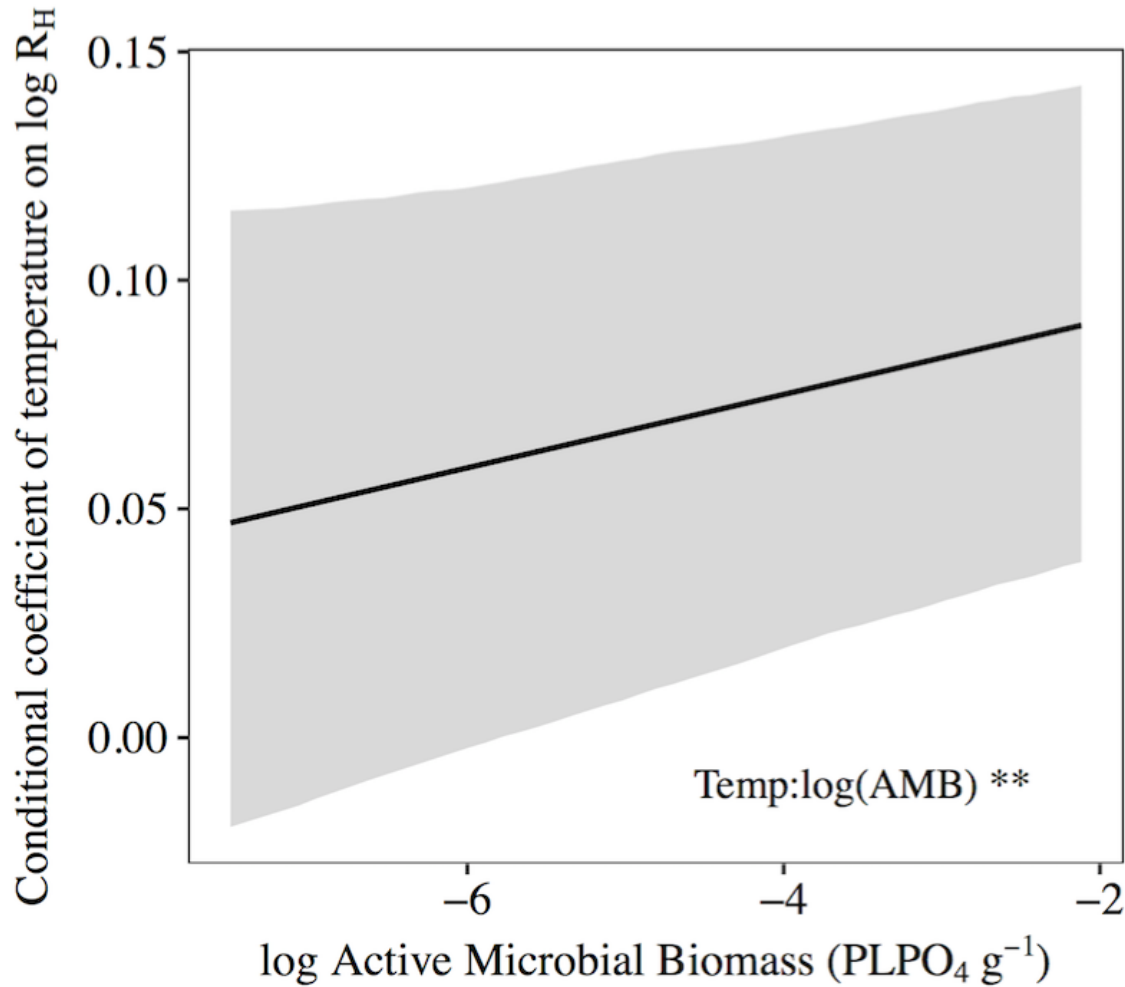

827

828 **Figure 4.** Changes in the coefficient of soil temperature, in the two-way interaction term  
829 with AMB (Table 1), conditional on AMB (*interplot* function in R). AMB in statistical  
830 model was log transformed to meet assumptions. Grey area indicates 95% confidence  
831 intervals.
